# Supplementary material for: Enhanced catalytic activity of titanosilicates controlled by hydrogen-bonding interactions
Source: Royal Society of Chemistry journal article supplement (doi:10.1039/c3cc43372b), 2013-01-01
Supplement: c3cc43372b.pdf [file c3cc43372b.pdf]

## Electronic Supplementary Information

### Enhanced Catalytic Activity on Titanosilicates Controlled by Hydrogen-Bonding Interactions

Xiujuan Deng, Shuo Zhang, Binshen Wang, Yuning Wang, Haihong Wu, Yueming Liu  
and Mingyuan He

#### Experimental

##### 1. Material Synthesis

##### Synthesis of TS-1

A typical synthesis of TS-1(named TS-1(Si/Ti)) in conventional method(M. Taramasso, G. Perego, B. Notari, US Parent 1983, 4 4105 01.) is as follow:

A mixture of TEOS and TBOT was added dropwise into TPAOH solution under stirring at room temperature. After hydrolyzing at 323 K for 30 min and removing alcohols by evaporation at 353 K, a clear sol was obtained having the following molar composition: 1.0SiO<sub>2</sub>: (0.0167, 0.01, 0.0067)TiO<sub>2</sub>: 0.18TPAOH: 18H<sub>2</sub>O. Then it was transferred into a Teflon-lined stainless-steel autoclave and crystallized at 443 K for 2 days. After that, the product was recovered by filtration, washed with distilled water, dried at 363 K overnight, and finally calcined at 823 K for 6 h. The real Si/Ti ratio of TS-1 tested by ICP was 61, 105, 138, respectively.

##### Synthesis of Ti-MWW

Ti-MWW was prepared by treating hydrothermally synthesized lamellar precursors with a 2 M HNO<sub>3</sub> solution following previous procedures (P. Wu, T.

Tatsumi, T. Komatsu and T. Yashima, *J. Phys. Chem. B*, 2001, 105, 2897.). And the final Si/Ti ratio was 42.

## **2. Catalytic Reactions**

### **The epoxidation of alkene without acceptor**

The epoxidation of alkene with H<sub>2</sub>O<sub>2</sub> was carried out in a 50 mL round-bottomed flask equipped with a reflux condenser. It was mixed with 50 mg of catalyst, 10 mL of solvent (methanol), 10 mmol of alkene and 10 mmol H<sub>2</sub>O<sub>2</sub> (30 wt% aqueous solution) under vigorous stirring at 333 K for 2 h. The product of the reaction was analyzed on an Agilent GC-7890A gas chromatograph equipped with a D-WAX capillary column (30 m×0.25 mm) and an FID detector using cyclohexanone as an internal standard. The amount of residual H<sub>2</sub>O<sub>2</sub> was determined by titration with 0.05 M Ce(SO<sub>4</sub>)<sub>2</sub> solution.

### **The epoxidation of alkene with introduced acceptor**

The epoxidation of alkene with H<sub>2</sub>O<sub>2</sub> was carried out in a 50 mL round-bottomed flask equipped with a reflux condenser. It was mixed with 50 mg of catalyst, 10 mL of solvent (methanol), 10 mmol of alkene, 10 mmol H<sub>2</sub>O<sub>2</sub> (30 wt% aqueous solution) and moderate ammonia or other hydrogen bond acceptors(0.4 mol/L aqueous solution) under vigorous stirring at 333 K for 2 h. The product of the reaction was analyzed as same as above.

### **The decomposition of H<sub>2</sub>O<sub>2</sub>**

The reaction in fixed-bed reactor: 0.5 g TS-1 was added into a columniform PTFE reactor (L=100 mm, d=4.4 mm), then the two ends of reactor was filled with quartz

fiber. The reaction temperature was controlled by a thermostatic circulating water bath. The mixed solutions of  $\text{CH}_3\text{OH}/\text{H}_2\text{O}_2/\text{H}_2\text{O}$  with different flow rates were fed to the reactor with a peristaltic pump (SURPASS 102S/R-20). The content of unreacted  $\text{H}_2\text{O}_2$  liquid was determined by titration with 0.05 M  $\text{Ce}(\text{SO}_4)_2$  solution. Then, the activation energy was calculated using Arrhenius equation ( $k=A\exp(-E_a/RT)$ ).

### 3. Characterization Methods

The X-ray diffraction (XRD) patterns were collected on a Rigaku Ultima IV diffractometer using  $\text{CuK}\alpha$  radiation and a nickel filter in the  $2\theta$  angle range of  $5^\circ$  to  $35^\circ$  at 35 kV and 25 mA. UV-Vis spectra were recorded on a Shimadzu UV-2400PC spectrophotometer using  $\text{BaSO}_4$  plate as a reference. Inductively coupled plasma (ICP) atomic emission spectroscopy was performed on a Thermo IRIS Intrepid II XSP atomic emission spectrometer.

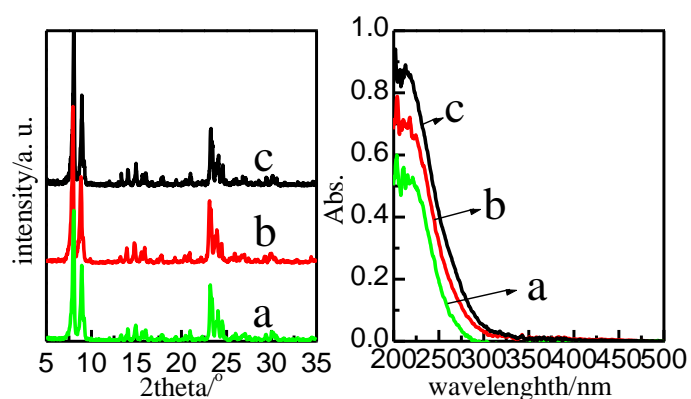

Fig. S1 XRD patterns and UV-Vis spectrum of TS-1 samples. (a) TS-1(138), (b) TS-1(105), (c) TS-1(61)

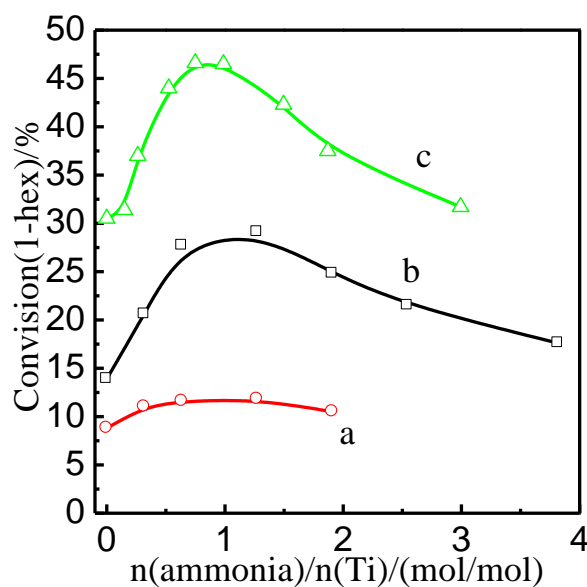

Fig. S2 Effect of ammonia on the catalytic performance of TS-1. (a) TS-1(138), (b) TS-1(105), (c) TS-1(61)

Reaction conditions: cat., 0.05 g; CH<sub>3</sub>OH, 10 mL; 1-hexene 10 mmol; H<sub>2</sub>O<sub>2</sub>, 10 mmol; ammonia; time 2 hours; temp., 333 K.

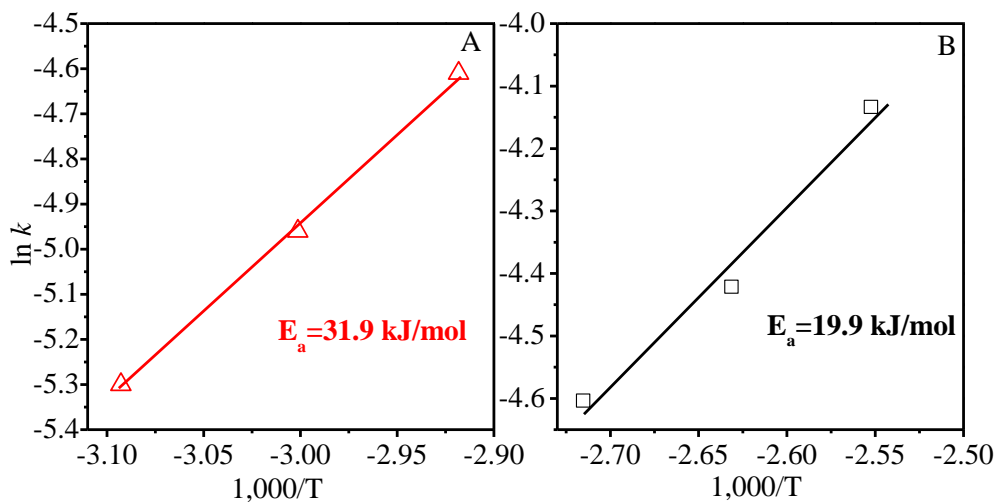

Fig. S3 The activation energy ( $E_a$ ) of formed hydroperoxy intermediate  $\text{Ti-O}_\alpha\text{-O}_\beta\text{-H}_{\text{end}}$  (A) the system without ammonia introduced (B) the system with ammonia introduced.  $c(\text{ammonia}) = 0.08\%$ . Reaction condition:  $E_a$  was tested in a fixed-bed reactor.  $c(\text{H}_2\text{O}_2) = 2.2\%$ ,  $\text{WHSV} = 5.13 \text{ h}^{-1}$ ,  $\text{TOS} = 1 \text{ min}$ .

Table S1 Catalytic properties of Ti-MWW in epoxidation of 1-hexene with H<sub>2</sub>O<sub>2</sub>.

| No. | solvent            | MAT | Convention/% |                               | Selevitivity/%   | Utilization/%                 |
|-----|--------------------|-----|--------------|-------------------------------|------------------|-------------------------------|
|     |                    |     | 1-hexene     | H <sub>2</sub> O <sub>2</sub> | 1, 2-epoxyhexane | H <sub>2</sub> O <sub>2</sub> |
| 1   | CH <sub>3</sub> OH | 0   | 12.4         | 12.7                          | 82.8             | 97.8                          |
| 2   | CH <sub>3</sub> CN | 0   | 45.2         | 47.8                          | 100              | 94.6                          |
| 3   | CH <sub>3</sub> OH | 1   | 34.2         | 41.4                          | 100              | 82.8                          |
| 4   | CH <sub>3</sub> CN | 1   | 59.3         | 70.0                          | 100              | 84.7                          |

Reaction conditions: cat. Ti-MWW 0.05 g; solvent 10 mL; 1-hexene 10 mmol; H<sub>2</sub>O<sub>2</sub> 10 mmol; ammonia; time 2 h; temp. 333 K.
